# Supplementary material
Source: Springer Nature journal article supplement (https://www.springermedizin.de/resource/supplementary/13033_2011_112_MOESM10_ESM.pdf/9651880)
Supplement: MOESM10 [file 9651880]

WAI-Patient rates psychiatrist, atT1  
 -v- patients' Perceived Procedural Justice (Lawyers)

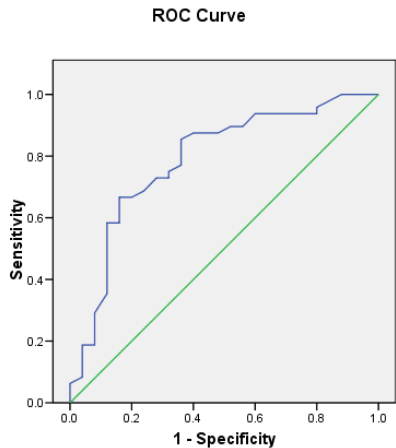

Diagonal segments are produced by ties.

WAI-Patient rates psychiatrist at T1  
 -v- patients' Perceived Procedural Justice-  
 (psychiatrist)

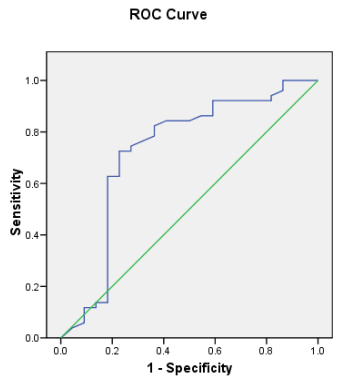

Diagonal segments are produced by ties.

WAI-Patient rates psychiatrist atT1  
 -v- patient's rating of Impact of Hearing

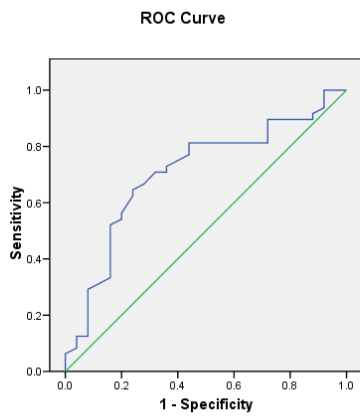

Diagonal segments are produced by ties.
